# Supplementary material
Source: HighWire-hosted journal article supplement (https://bmjopen.bmj.com/content/14/7/e083460)
Supplement: inline-supplementary-material-5 [file inline-supplementary-material-5.pdf]

### **Supplementary file 5: The Amsterdam Preoperative Anxiety and Information Scale (APAIS)**

1. I am worried about the anesthetic.
2. The anesthetic is on my mind continually.
3. I would like to know as much as possible about the anesthetic.
4. I am worried about the procedure.
5. The procedure is on my mind continually.
6. I would like to know as much as possible about the procedure.

The measure of agreement with these statements should be graded on a five-point Likert scale from

1 = not at all to 5 = extremely.
